# Supplementary material for: Acute myeloid leukemia-driven IL-3-dependent upregulation of BCL2 in non-malignant hematopoietic stem and progenitor cells increases venetoclax-induced cytopenias
Source: PubMed Central journal article supplement — Haematologica. 2024 Jan 4;109(5):1576–81. doi: 10.3324/haematol.2023.283944 (PMC11063845; doi:10.3324/haematol.2023.283944), 2024-01-04
Supplement: 2023_283944_FOWLER-SHORTEN_SUPPL.pdf [file 2023_283944_FOWLER-SHORTEN_SUPPL.pdf]

# Acute myeloid leukemia-driven IL-3-dependent upregulation of BCL2 in non-malignant hematopoietic stem and progenitor cells increases venetoclax-induced cytopenias

## Authors

---

Dominic J. Fowler-Shorten,<sup>1°</sup> Rebecca S. Maynard,<sup>1°</sup> Katherine Hampton,<sup>1°</sup> Annalisa Altera,<sup>1°</sup> Matthew Markham,<sup>1°</sup> Martha Ehikioya,<sup>1°</sup> Edyta E. Wojtowicz,<sup>2</sup> Kristian M. Bowles,<sup>1,3#°</sup> Stuart A. Rushworth<sup>1#°</sup> and Charlotte Hellmich<sup>1,3#°</sup>

<sup>1</sup>Norwich Medical School, University of East Anglia; <sup>2</sup>Earlham Institute, Norwich Research Park and <sup>3</sup>Department of Haematology, Norfolk and Norwich University Hospital NHS Trust, Norwich, UK

<sup>#</sup>SAR and CH contributed equally as senior authors.

<sup>°</sup>Current address: Centre for Metabolic Health, Norwich Medical School, University of East Anglia, Norwich, UK

Correspondence:

C. HELLMICH - c.hellmich@uea.ac.uk

S.A. RUSHWORTH - s.rushworth@uea.ac.uk

<https://doi.org/10.3324/haematol.2023.283944>

Received: July 19, 2023.

Accepted: December 28, 2023.

Early view: January 4, 2024.

©2024 Ferrata Storti Foundation

Published under a CC BY license 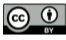

Supplementary figure 1

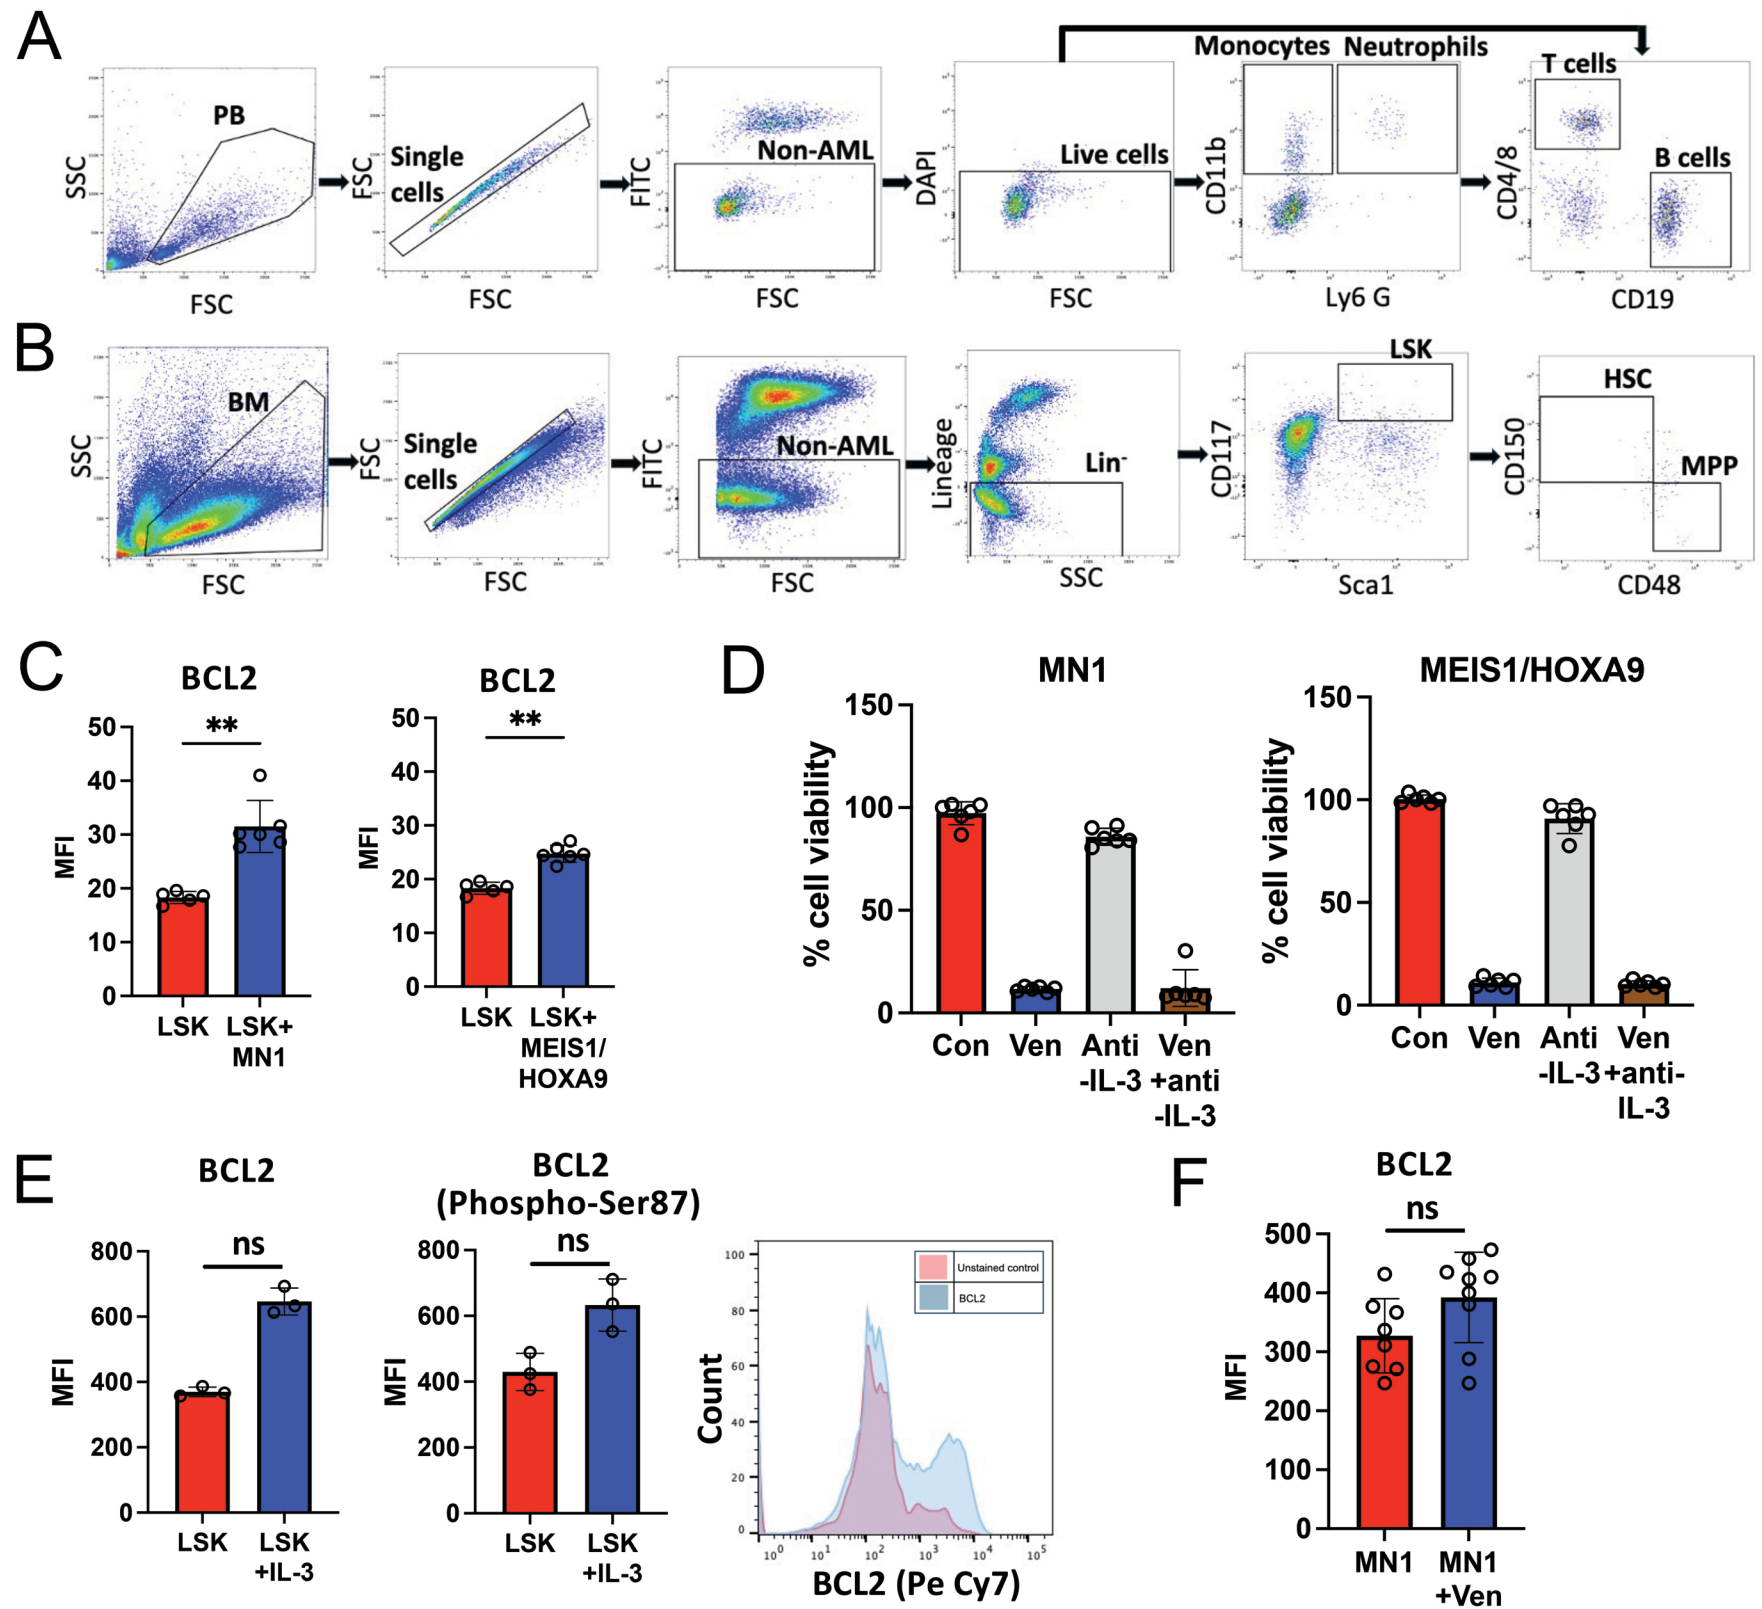

**Supplementary Fig 1 – Flow cytometry gating, BCL2 expression and cell viability.**

A) Gating strategy for B cells (CD4<sup>-</sup> CD8<sup>-</sup> CD19<sup>+</sup>), T cells (CD4<sup>+</sup> CD8<sup>+</sup> CD19<sup>-</sup>), monocytes (CD11b<sup>+</sup> Ly6 G<sup>-</sup>) and neutrophils (CD11b<sup>+</sup> Ly6 G<sup>+</sup>). B) Gating strategy for non-malignant HSC (Lin<sup>-</sup> Sca1<sup>+</sup> CD117<sup>+</sup> CD150<sup>+</sup> CD48<sup>-</sup>), multipotent progenitor (MPP) (Lin<sup>-</sup> Sca1<sup>+</sup> CD117<sup>+</sup> CD150<sup>-</sup> CD48<sup>+</sup>) and LSK (Lin<sup>-</sup> Sca1<sup>+</sup> CD117<sup>+</sup>). C) BCL2 protein expression is elevated in LSKs co-cultured with both MN1 and MEIS1/HOXA9 AML subtypes. LSKs were isolated from BM of young C57BL/6 mice and 5x10<sup>4</sup> cells were co-cultured in transwells with either MN1 or MEIS1/HOXA9 cells for 48h. BCL2 protein level was quantified by mean fluorescence intensity (MFI) in LSKs co-cultured with AML cells (*n* = 6) compared to LSK-only controls (*n* = 5) using flow cytometry. \*\**p* < 0.01 using Mann-Whitney U Test. D) Blocking IL-3 does not make AML cells resistant to venetoclax. 5x10<sup>4</sup> MN1 and MEIS1/HOXA9 cells were cultured with 10 μM venetoclax, 5 μg/mL anti-IL-3 or both for 24h. Percentage cell viability was quantified using the CellTiter-Glo® luminescent assay in MN1 and MEIS1/HOXA9 cells remaining untreated (*n* = 6), treated with venetoclax (*n* = 6), treated with anti-IL-3 (*n* = 6) and treated with venetoclax and anti-IL-3 (*n* = 6). E) Total BCL2 and phosphorylated BCL2 protein levels are elevated in LSKs treated with IL-3. 2x10<sup>5</sup> LSKs were cultured in DMEM supplemented with 10% FBS and 1% Pen-Strep and treated with 100 ng/mL IL-3 for 24h. Total BCL-2 protein level and phosphorylated BCL2 within the BCL2-positive population was quantified by mean fluorescence intensity (MFI) in LSKs treated with IL-3 (*n* = 3) compared to LSK-only controls (*n* = 3) using flow cytometry. Data are non-significant using Mann-Whitney U Test. F) BCL2 protein levels were quantified by MFI in the lineage positive cell population of MN1 engrafted mice treated with venetoclax (*n* = 9) compared to control MN1 engrafted mice (*n* = 8). Data are non-significant using Mann-Whitney U Test. All data in C-F are represented as median + interquartile range.
